# Supplementary material
Source: publisher site journal article supplement (https://www.dovepress.com/article/561413)
Supplement: Supplementary file 1 [file 561413%20Supporting%20Information.docx]

**Supporting Information**


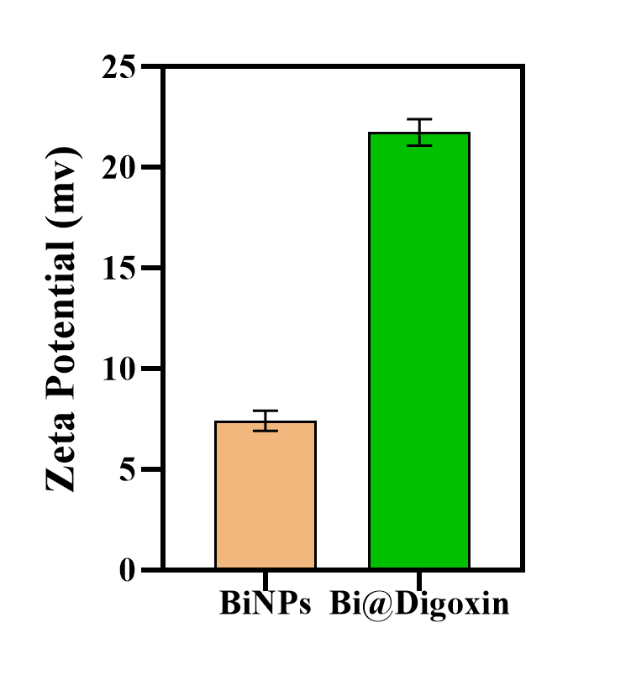


**Figure S1.** Alterations in the zeta potential of BiNPs observed pre- and post-digoxin loading.

**
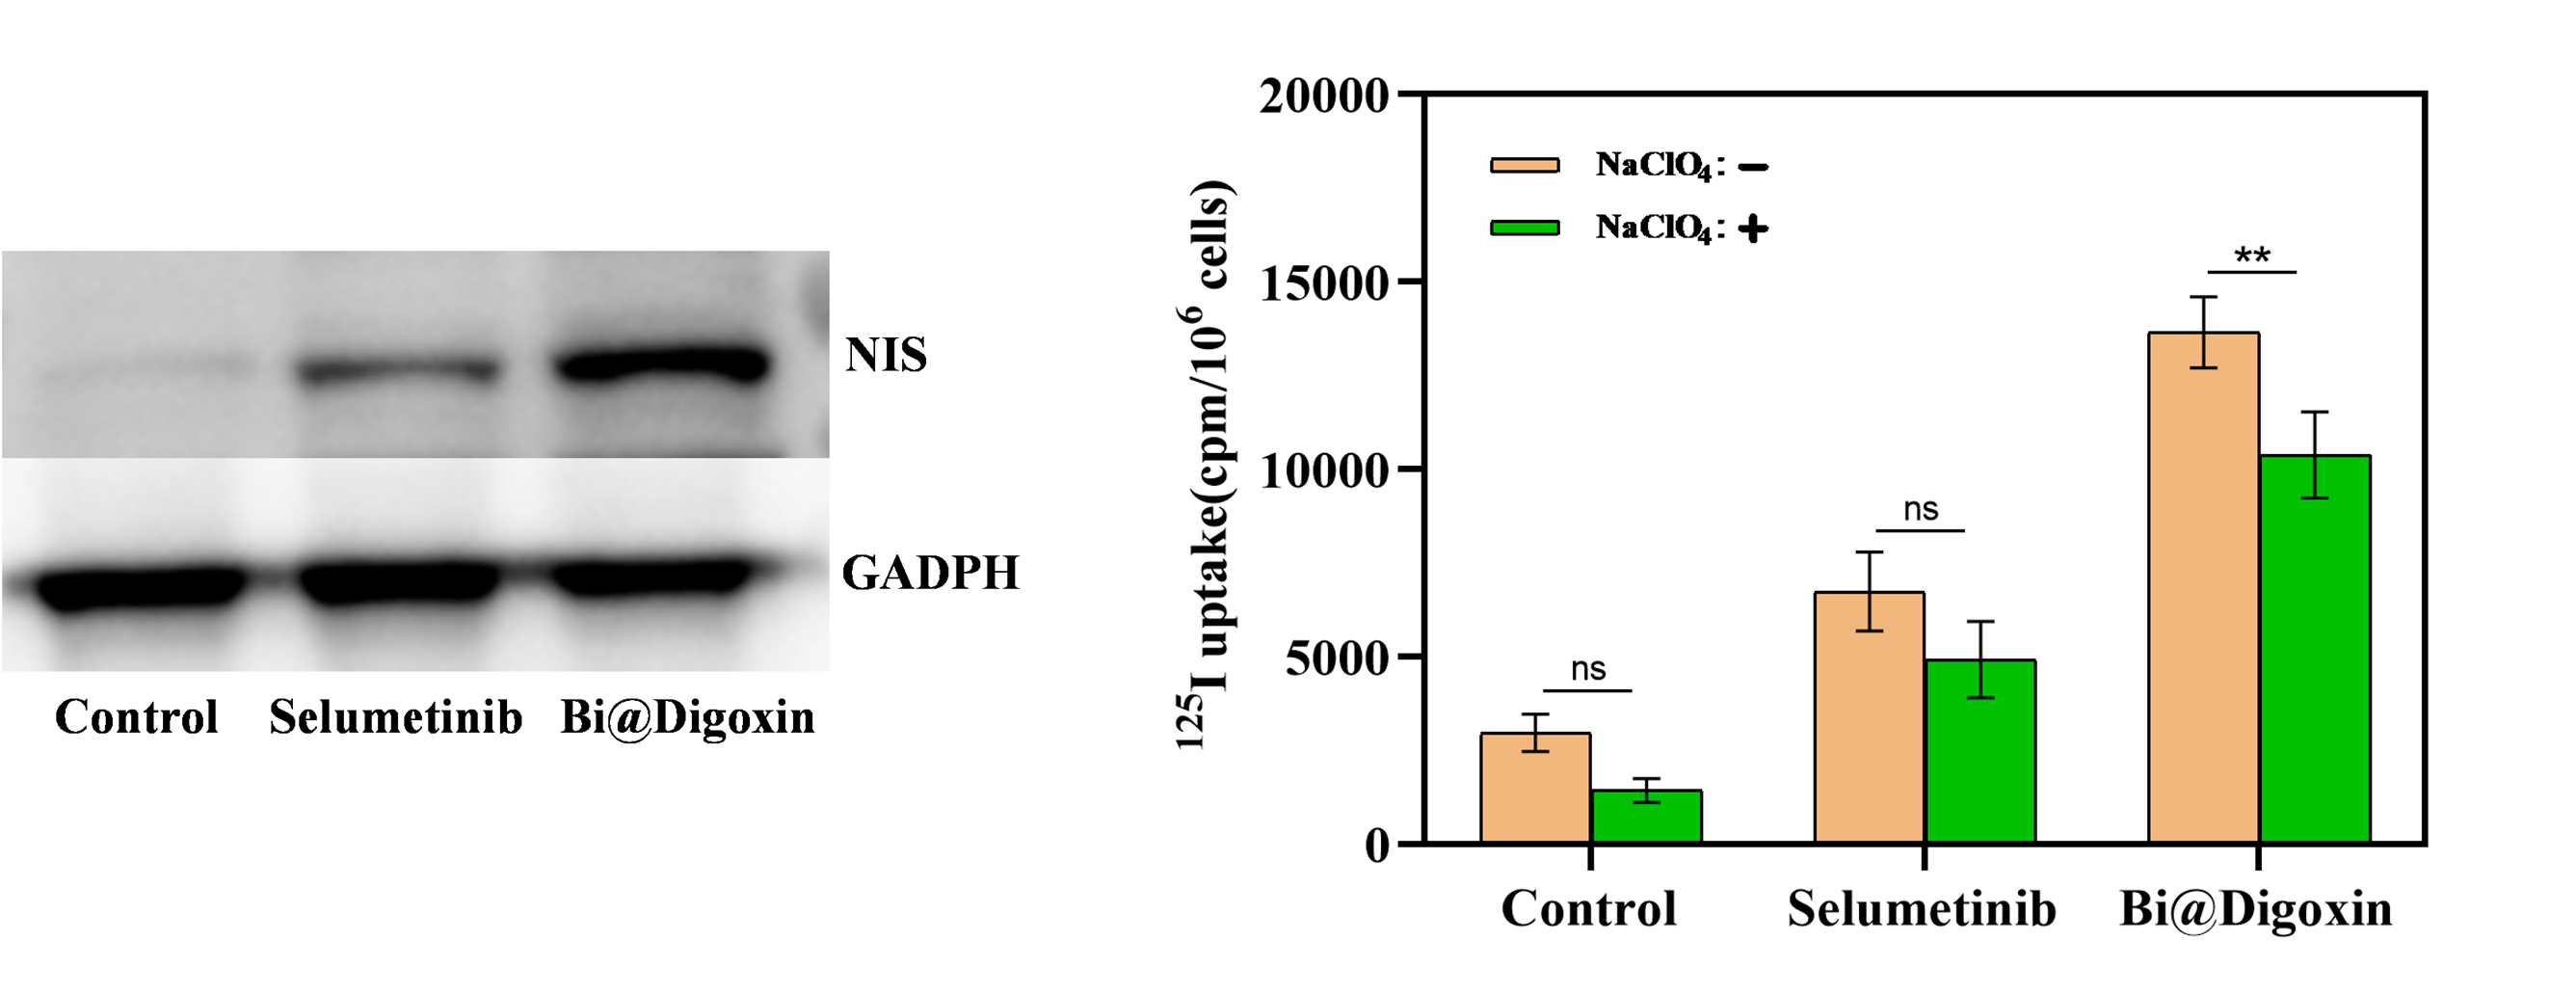
Figure S2.** Comparison of the redifferentiation effects between Selumetinib and Bi@Digoxin. Data are shown as mean ± SD. (n = 3), ns (not significant), **p < 0.01.


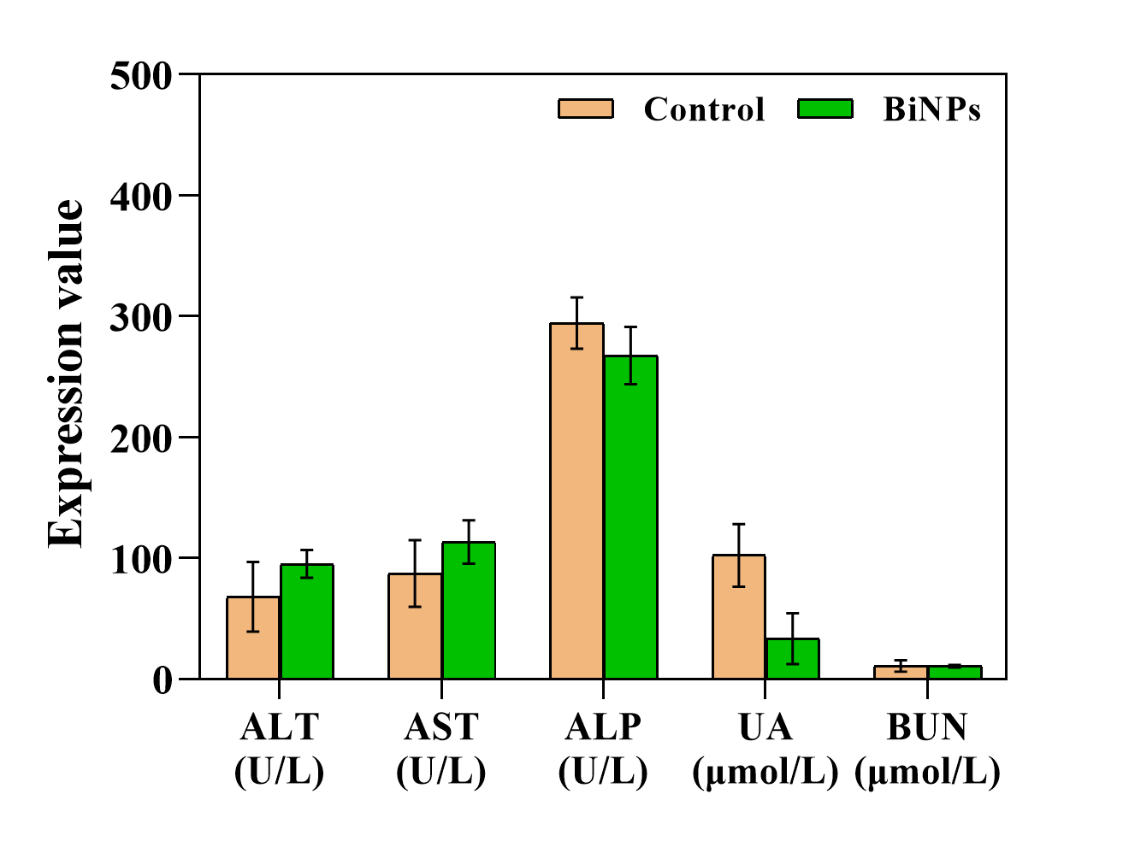


**Figure S3.** Blood biochemical assays in different groups of mice.


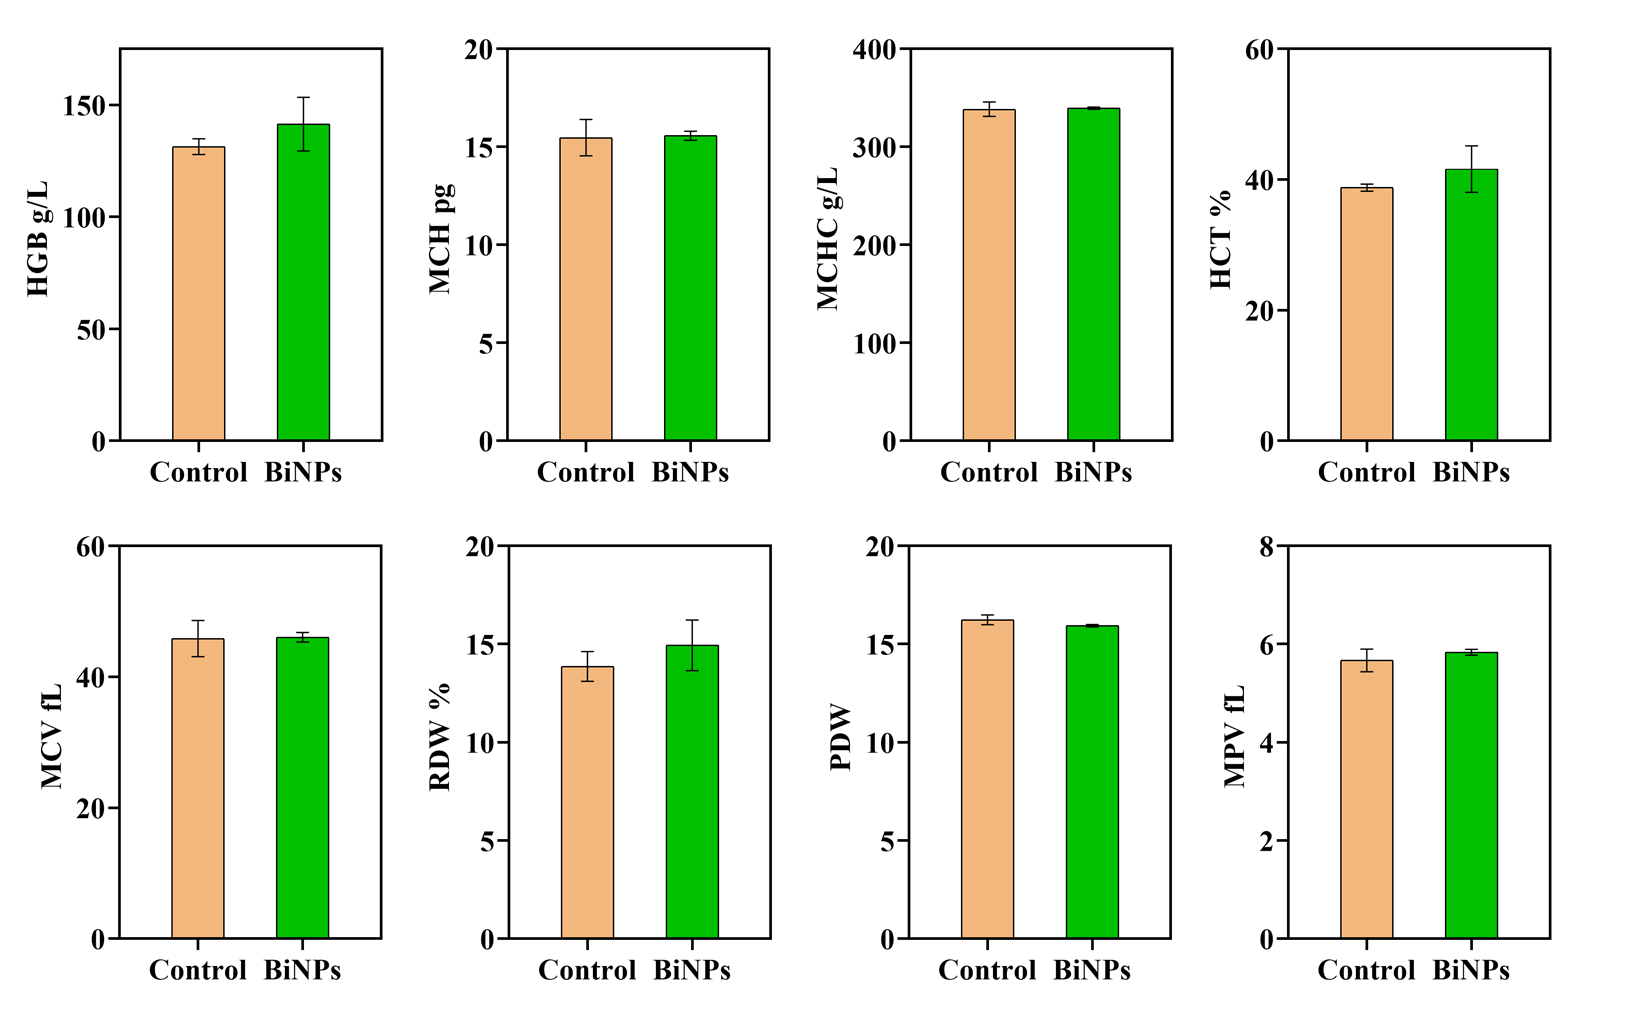


**Figure S4.** Blood routine indexes in different groups of mice.


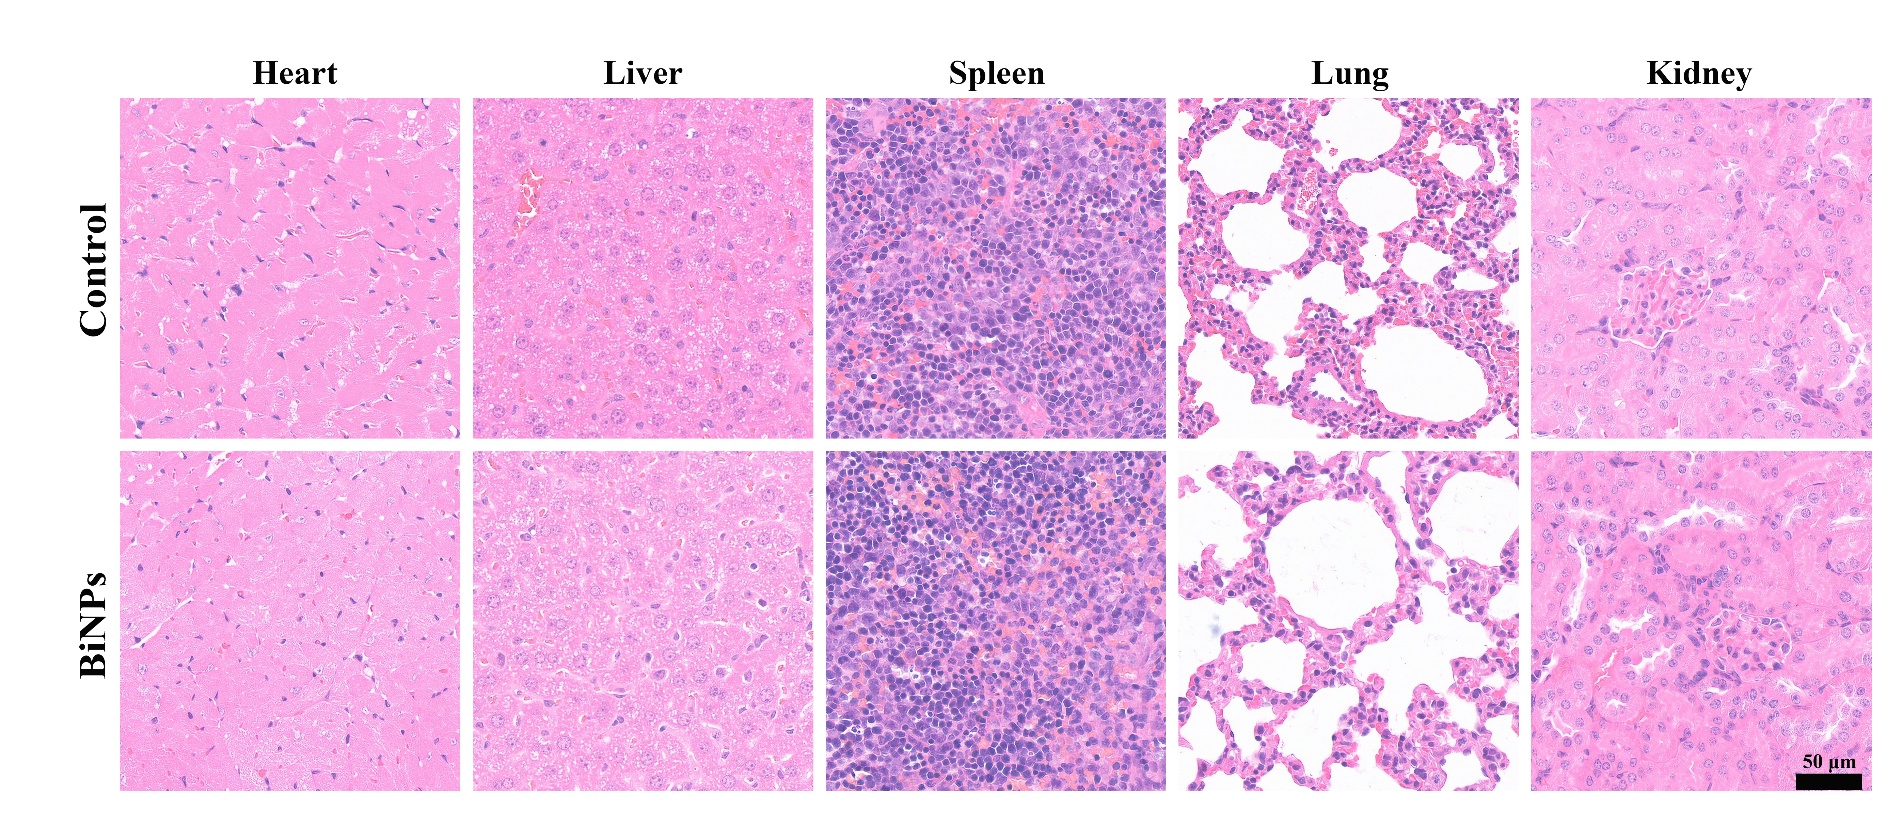


**Figure S5.** H&E staining of various organs obtained from mice.


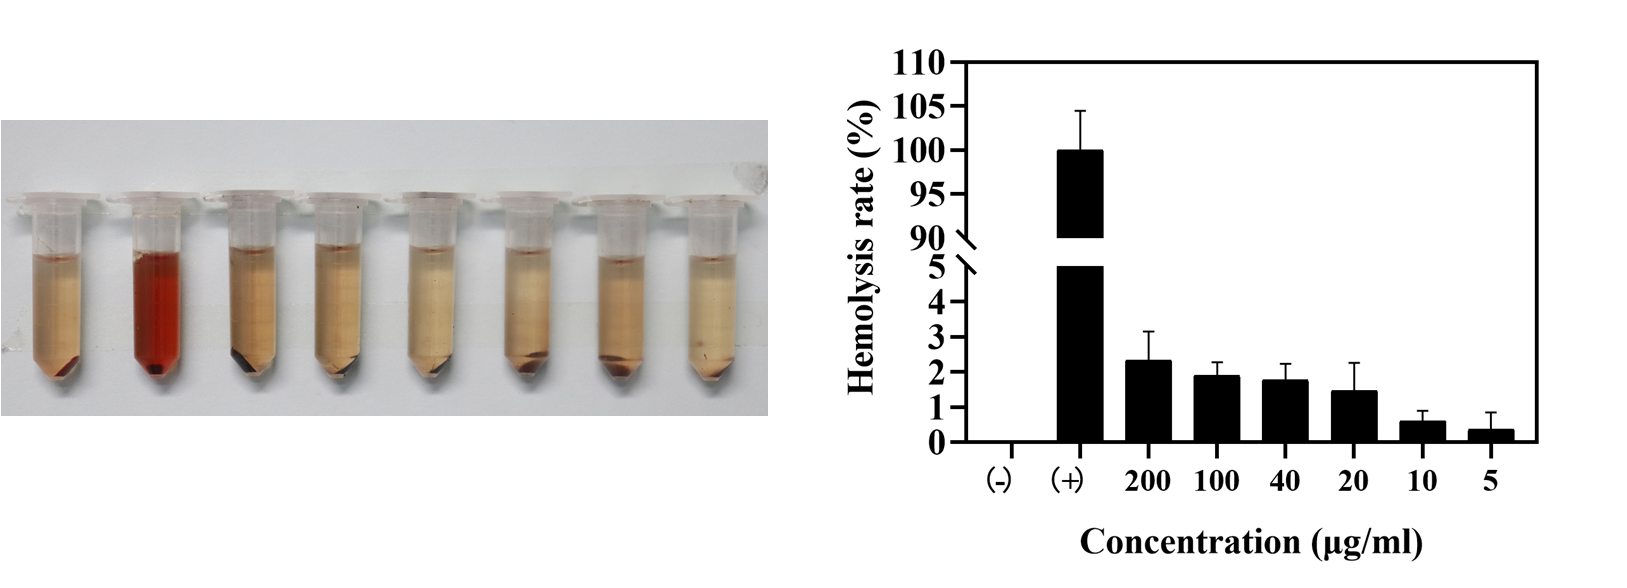


**Figure S6.** Hemolysis rate analysis of BiNPs with different concentrations.

**
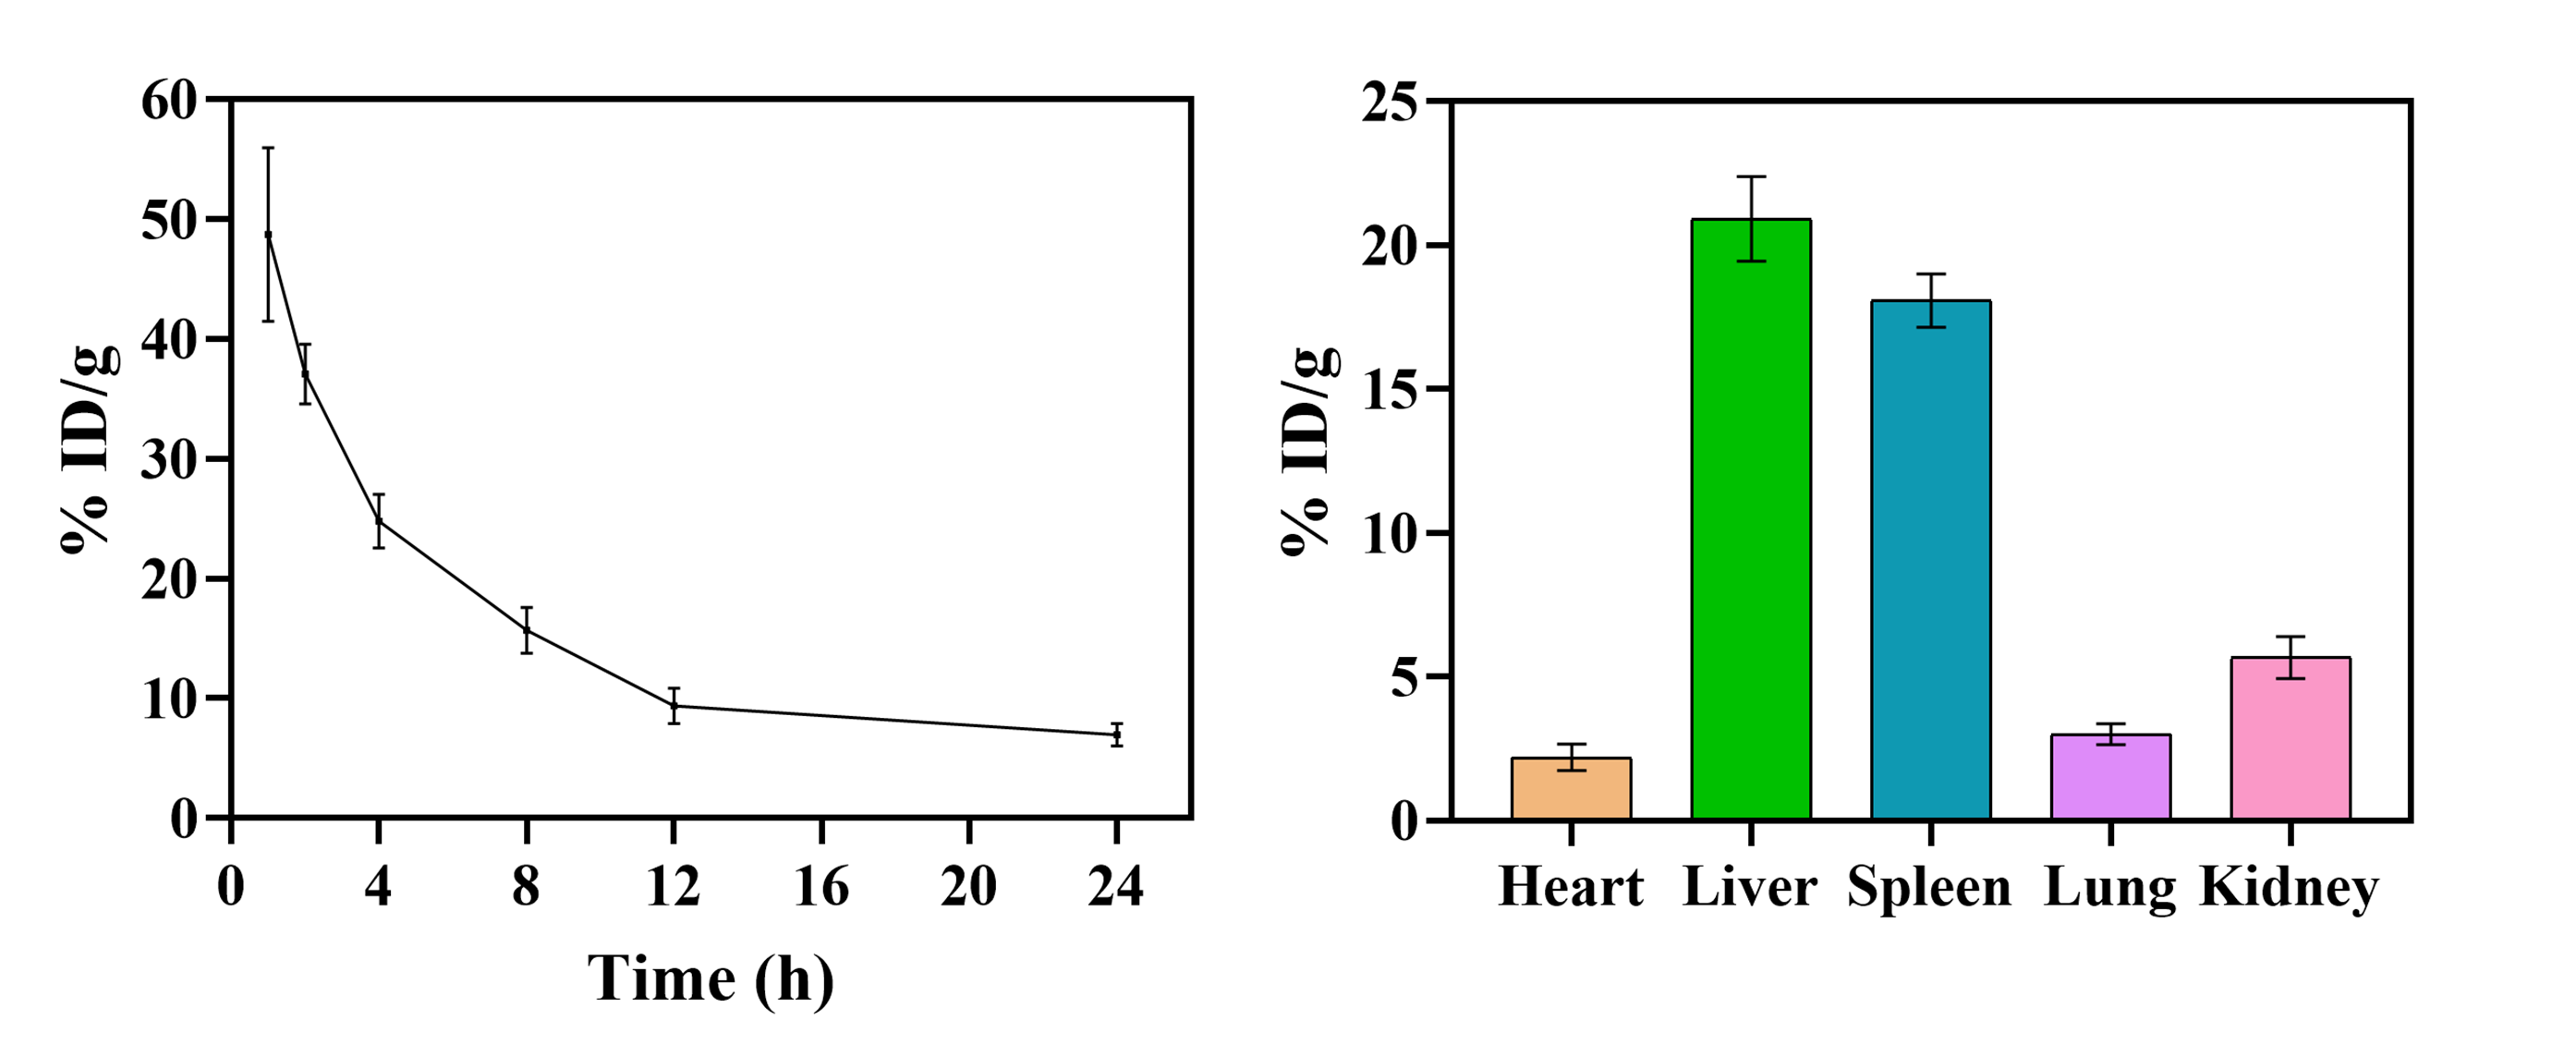
**

**Figure S7.** Circulation curve and distribution histogram of BiNPs in mice.
